# Supplementary material for: Lightweight foams of amine-rich organosilica and cellulose nanofibrils by foaming and controlled condensation of aminosilane
Source: Royal Society of Chemistry journal article supplement (doi:10.1039/c8qm00360b), 2018-01-01
Supplement: c8qm00360b1.pdf [file c8qm00360b1.pdf]

## Supporting Information – Materials Chemistry Frontiers

### Lightweight foams of amine-rich organosilica and cellulose nanofibrils by foaming and controlled condensation of aminosilane

Korneliya Gordeyeva,<sup>a</sup> Hugo Voisin,<sup>a</sup> Niklas Hedin,<sup>a</sup> Lennart Bergström<sup>a</sup> and Nathalie Lavoine<sup>\*a, b</sup>

**a**

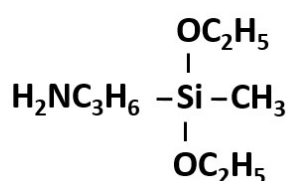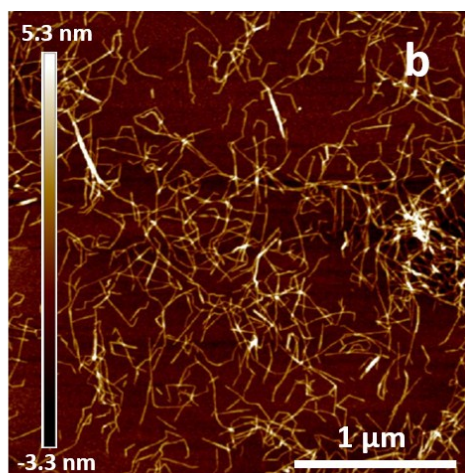

**SI.1.** Materials for the preparation of solid composite siliceous foams: (a) chemical structure of 3-aminopropyl(methyl)diethoxysilane (AS). (b) Topography image of TCNFs.

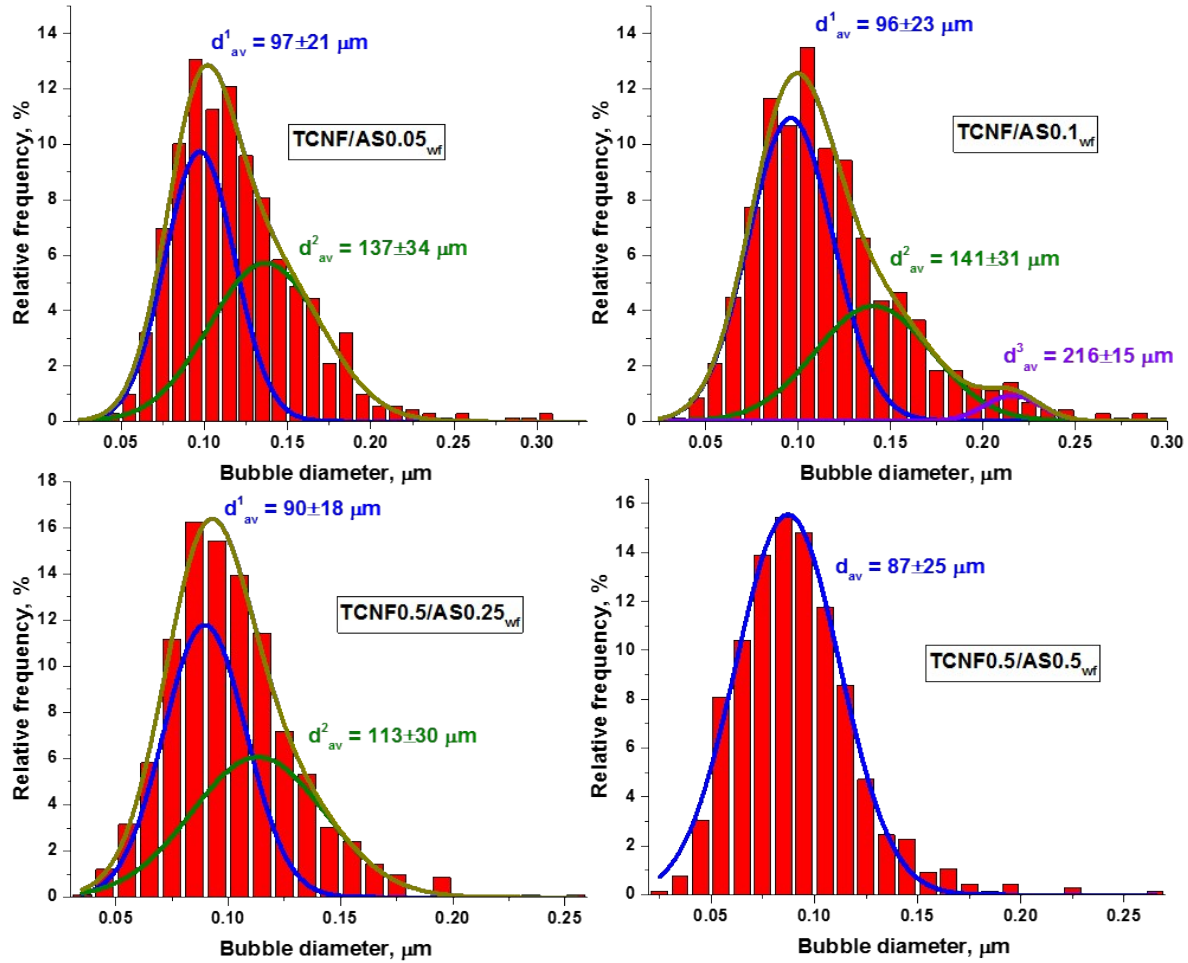

**SI.2.** Distributions of the air bubble diameters in TCNF/AS<sub>wf</sub>, measured by optical microcamera right after foaming: *upper left* TCNF/AS0.05, *upper right* TCNF/AS0.1, *bottom left* TCNF/AS0.25 and *bottom right* TCNF/AS0.5. The distributions were fitted with a Gaussian function and the average diameters are presented for the corresponding Gaussian peak on each histogram.

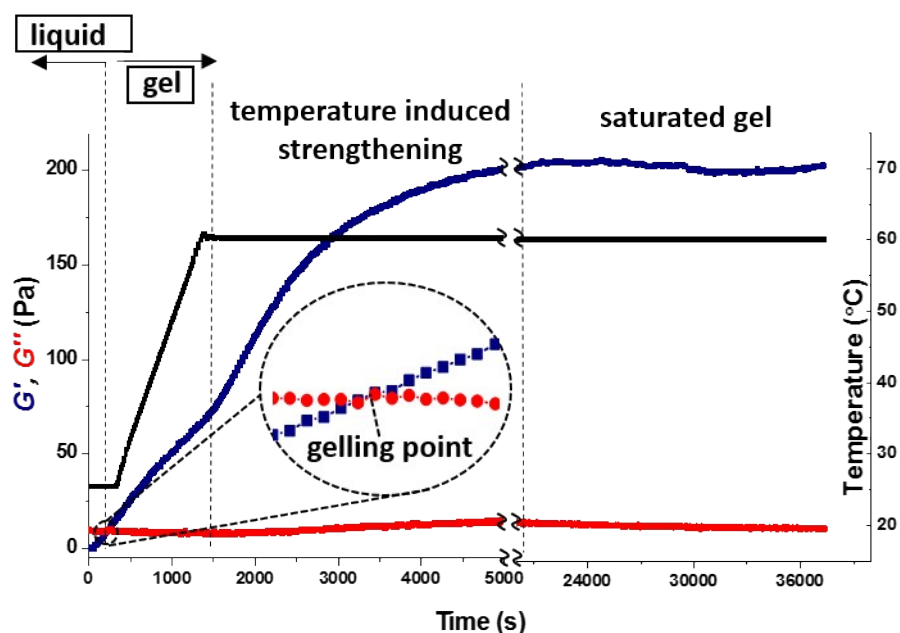

**SI.3.** Evolution of the storage ( $G'$ , blue curve) and loss ( $G''$ , red curve) moduli over time for TCNF/AS3<sub>wf</sub>. The wet foam was heated at 60°C (heating rate of 2°C/min) and kept at this constant temperature overnight. The inset zooms in on the gelling point.

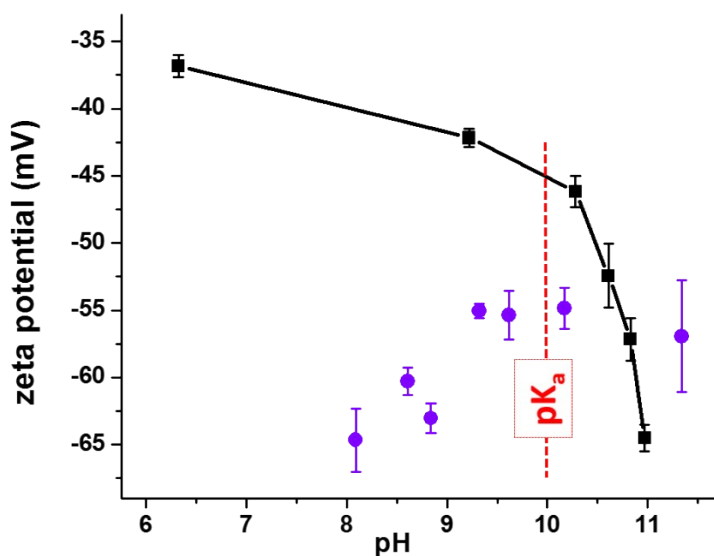

**SI.4.** Zeta potential of a dilute aqueous dispersion of TCNFs (purple dots) and of the TCNF/AS1.5<sub>d</sub> (black squares) as a function of the pH. The red dashed line represents the  $pK_a$  ( $\approx 10$ ) value of neat AS.

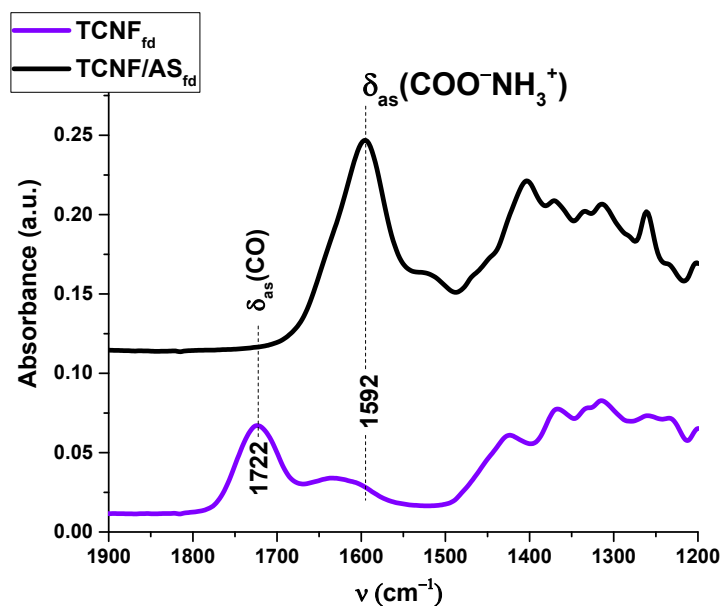

**SI.5.** ATR FTIR spectra of TCNF<sub>fd</sub>(pH 4.5) with carboxylic acid groups (–COOH) (bottom purple curve) and TCNF/AS<sub>fd</sub>(pH 9.6) (top black curve) with equimolar content of AS amino-groups and TCNFs carboxylic groups. The TCNFs were ion exchanged from Na<sup>+</sup> to H<sup>+</sup> using a 0.5 M HCl solution.

**Table SI.1.** Relative integral area for the bands of AS monomers, dimers and polymers determined from the liquid state {1H}<sup>29</sup>Si NMR of AS and TCNF/AS dispersions at different temperature, pH, and time.

| Dispersions and Foams                                                      | Integral area for AS monomer | Integral area for AS dimer or polymer end-groups | Integral area for organosilica polymer |
|----------------------------------------------------------------------------|------------------------------|--------------------------------------------------|----------------------------------------|
| AS3d at 20 °C after 4 h                                                    | 1                            | 0.42                                             | 0.05                                   |
| AS3d at 20 °C after 16 h                                                   | 1                            | 0.43                                             | 0.03                                   |
| TCNF/AS3d(11.1) at 20 °C after 4 h                                         | 1                            | 0.42                                             | 0.03                                   |
| TCNF/AS3d(11.1) at 20 °C after 16 h                                        | 1                            | 0.43                                             | 0.03                                   |
| TCNF/AS3d(11.1) at 60 °C after 4 h                                         | 1                            | 0.43                                             | 0.02                                   |
| TCNF/AS3d(11.1) at 60 °C after 16 h                                        | 1                            | 0.48                                             | 0.03                                   |
| TCNF/AS3d(11.1) at 60 °C with in situ evaporation after 4 h                | 1                            | 0.52                                             | 0.03                                   |
| TCNF/AS3d(11.1) at 60 °C with in situ evaporation after 16 h               | 1                            | 0.51                                             | 0.08                                   |
| TCNF/AS3d(11.1) at 60 °C with pre-evaporation (60 °C, overnight) after 4 h | 1                            | 1.49                                             | 0.65                                   |
| TCNF/AS3d(10.7) at 60 °C after 4 h                                         | 1                            | 0.52                                             | 0.05                                   |
